# Supplementary material for: Heart failure medication dosage and survival in women and men seen at outpatient clinics
Source: HighWire-hosted journal article supplement (doi:10.1136/heartjnl-2021-319229), 2021-07-14
Supplement: heartjnl-2021-319229supp001_data_supplement.pdf [file heartjnl-2021-319229supp001_data_supplement.pdf]

## Supplementary files

**Figure legends**

## Supplementary figure 1

Sex-specific relationship between percentage of target dose and all cause mortality risk in the subset of patients with heart failure with preserved ejection fraction for ACE inhibitors / ARBs (A) and beta-blockers (B)

## Supplementary figure 2

Sex-specific relationship between percentage of target dose and all cause mortality risk in the subset of patients with specific mention of heart failure in their diagnosis text for ACE inhibitors / ARBs (A) and beta-blockers (B), and using last recorded dosage for ACE inhibitors / ARBs (C) and beta blockers (D)

**Tables**

|                              | Angiotensin-converting enzyme inhibitors / Angiotensin II receptor blockers |     | Beta-blockers |     |
|------------------------------|-----------------------------------------------------------------------------|-----|---------------|-----|
|                              | Women                                                                       | Men | Women         | Men |
| <b>Heart failure subtype</b> |                                                                             |     |               |     |
| Reduced ejection fraction    | 128                                                                         | 250 | 126           | 219 |
| Midrange ejection fraction   | 60                                                                          | 93  | 63            | 87  |
| Preserved ejection fraction  | 210                                                                         | 126 | 162           | 70  |
| Unrecorded ejection fraction | 30                                                                          | 37  | 30            | 38  |

Supplementary Table 1 Overview of number of women and men included in each analysis based on heart failure subtype and medication group

|                                                                          | Heart failure specifically<br>mentioned in the diagnosis text | Last observation<br>carried forward | Heart failure with preserved<br>ejection fraction (EF ≥ 40%) |
|--------------------------------------------------------------------------|---------------------------------------------------------------|-------------------------------------|--------------------------------------------------------------|
|                                                                          | Adjusted HR<br>(95%CI)                                        | Adjusted HR<br>(95%CI)              | Adjusted HR<br>(95%CI)                                       |
| <b>Whole cohort</b>                                                      |                                                               |                                     |                                                              |
| <b>Angiotensin-converting enzyme inhibitors/Angiotensin II receptors</b> |                                                               |                                     |                                                              |
| < 50% of target dose                                                     | 0.82 (0.60-1.12)                                              | 1.03 (0.78-1.37)                    | 0.72 (0.47-1.10)                                             |
| ≥ 50% of target dose (ref)                                               | 1                                                             | 1                                   | 1                                                            |
| <b>Beta-blockers</b>                                                     |                                                               |                                     |                                                              |
| < 50% of target dose                                                     | 1.21 (0.88-1.67)                                              | 1.08 (0.80-1.44)                    | 0.91 (0.59-1.42)                                             |
| ≥ 50% of target dose (ref)                                               | 1                                                             | 1                                   | 1                                                            |
| <b>Women</b>                                                             |                                                               |                                     |                                                              |
| <b>Angiotensin-converting enzyme inhibitors/Angiotensin II receptors</b> |                                                               |                                     |                                                              |
| < 50% of target dose                                                     | 0.85 (0.53-1.35)                                              | 1.05 (0.69-1.61)                    | 0.61 (0.33-1.12)                                             |
| ≥ 50% of target dose (ref)                                               | 1                                                             | 1                                   | 1                                                            |
| <b>Beta-blockers</b>                                                     |                                                               |                                     |                                                              |
| < 50% of target dose                                                     | 1.31 (0.83-2.07)                                              | 0.87 (0.57-1.33)                    | 0.83 (0.46-1.49)                                             |
| ≥ 50% of target dose (ref)                                               | 1                                                             | 1                                   | 1                                                            |
| <b>Men</b>                                                               |                                                               |                                     |                                                              |
| <b>Angiotensin-converting enzyme inhibitors/Angiotensin II receptors</b> |                                                               |                                     |                                                              |
| < 50% of target dose                                                     | 0.82 (0.54-1.24)                                              | 1.03 (0.71-1.50)                    | 0.84 (0.45-1.57)                                             |
| ≥ 50% of target dose (ref)                                               | 1                                                             | 1                                   | 1                                                            |
| <b>Beta-blockers</b>                                                     |                                                               |                                     |                                                              |

|                            |                  |                  |                  |
|----------------------------|------------------|------------------|------------------|
| < 50% of target dose       | 1.11 (0.71-1.75) | 1.31 (0.88-1.99) | 1.04 (0.53-2.06) |
| ≥ 50% of target dose (ref) | 1                | 1                | 1                |

Supplementary Table 2      General and sex-specific hazard ratios for the relationship between percentage of target dose and all-cause mortality for sensitivity analyses in the subgroup of patients with heart failure specifically mentioned in their diagnosis text, using the last observed medication dosage instead of baseline, and using a different definition of HF<sub>r</sub>EF

CI = confidence interval, HR=hazard ratio

|                                                                          | Literature-based<br>categories<br>Adjusted HR<br>(95% CI) | Cohort-based<br>tertiles<br>Adjusted HR<br>(95% CI) | Quartiles<br>Adjusted HR<br>(95% CI) |
|--------------------------------------------------------------------------|-----------------------------------------------------------|-----------------------------------------------------|--------------------------------------|
| <b>Whole cohort</b>                                                      |                                                           |                                                     |                                      |
| <i>Angiotensin-converting enzyme inhibitors/Angiotensin II receptors</i> |                                                           |                                                     |                                      |
| First category (ref)                                                     | 1                                                         | 1                                                   | 1                                    |
| Second category                                                          | 0.98 (0.72-1.34)                                          | 0.86 (0.61-1.21)                                    | 1.04 (0.63-1.71)                     |
| Third category                                                           | 1.01 (0.70-1.48)                                          | 0.90 (0.64-1.26)                                    | 1.01 (0.61-1.68)                     |
| Fourth category                                                          | na                                                        | na                                                  | 1.04 (0.60-1.79)                     |
| <i>Beta-blockers</i>                                                     |                                                           |                                                     |                                      |
| First category (ref)                                                     | 1                                                         | 1                                                   | 1                                    |
| Second category                                                          | 0.92 (0.67-1.26)                                          | 1.70 (1.18-2.44)                                    | 1.29 (0.76-2.19)                     |
| Third category                                                           | 1.11 (0.67-1.84)                                          | 0.97 (0.65-1.44)                                    | 1.10 (0.64-1.90)                     |
| Fourth category                                                          | na                                                        | na                                                  | 1.43 (0.75-2.74)                     |
| <b>Women</b>                                                             |                                                           |                                                     |                                      |
| <i>Angiotensin-converting enzyme inhibitors/Angiotensin II receptors</i> |                                                           |                                                     |                                      |
| First category (ref)                                                     | 1                                                         | 1                                                   | 1                                    |
| Second category                                                          | 0.83 (0.50-1.40)                                          | 0.95 (0.56-1.62)                                    | 1.10 (0.51-2.36)                     |
| Third category                                                           | 1.12 (0.66-1.89)                                          | 1.05 (0.63-1.74)                                    | 0.92 (0.41-2.06)                     |
| Fourth category                                                          | na                                                        | na                                                  | 1.16 (0.52-2.62)                     |
| <i>Beta-blockers</i>                                                     |                                                           |                                                     |                                      |
| First category (ref)                                                     | 1                                                         | 1                                                   | 1                                    |
| Second category                                                          | 0.97 (0.63-1.51)                                          | 2.25 (1.31-3.88)                                    | 2.13 (0.91-5.01)                     |
| Third category                                                           | 0.62 (0.25-1.56)                                          | 1.06 (0.58-1.96)                                    | 1.72 (0.72-4.11)                     |
| Fourth category                                                          | na                                                        | na                                                  | 1.58 (0.54-4.60)                     |

| <b>Men</b>                                                                      |                  |                  |                  |
|---------------------------------------------------------------------------------|------------------|------------------|------------------|
| <b><i>Angiotensin-converting enzyme inhibitors/Angiotensin II receptors</i></b> |                  |                  |                  |
| First category (ref)                                                            | 1                | 1                | 1                |
| Second category                                                                 | 1.05 (0.70-1.57) | 0.79 (0.51-1.22) | 1.00 (0.52-1.93) |
| Third category                                                                  | 0.90 (0.52-1.56) | 0.79 (0.50-1.24) | 1.04 (0.54-2.00) |
| Fourth category                                                                 | na               | na               | 0.92 (0.44-1.94) |
| <b><i>Beta-blockers</i></b>                                                     |                  |                  |                  |
| First category (ref)                                                            | 1                | 1                | 1                |
| Second category                                                                 | 0.86 (0.55-1.35) | 1.29 (0.78-2.12) | 0.82 (0.41-1.62) |
| Third category                                                                  | 1.61 (0.87-2.98) | 0.91 (0.54-1.52) | 0.74 (0.37-1.50) |
| Fourth category                                                                 | na               | na               | 1.27 (0.56-2.89) |

Supplementary Table 3      General and sex-specific hazard ratios for the relationship between percentage of target dose and all-cause mortality using three different medication dosage categories

CI = confidence interval, HR=hazard ratio
