# Supplementary figures and images for: Heart failure medication dosage and survival in women and men seen at outpatient clinics
Source: PubMed Central journal article supplement — Heart. 2021 Jul 14;107(21):1748–55. doi: 10.1136/heartjnl-2021-319229 (PMC8522453; doi:10.1136/heartjnl-2021-319229), 2021-07-14

### A Heart failure with preserved ejection fraction

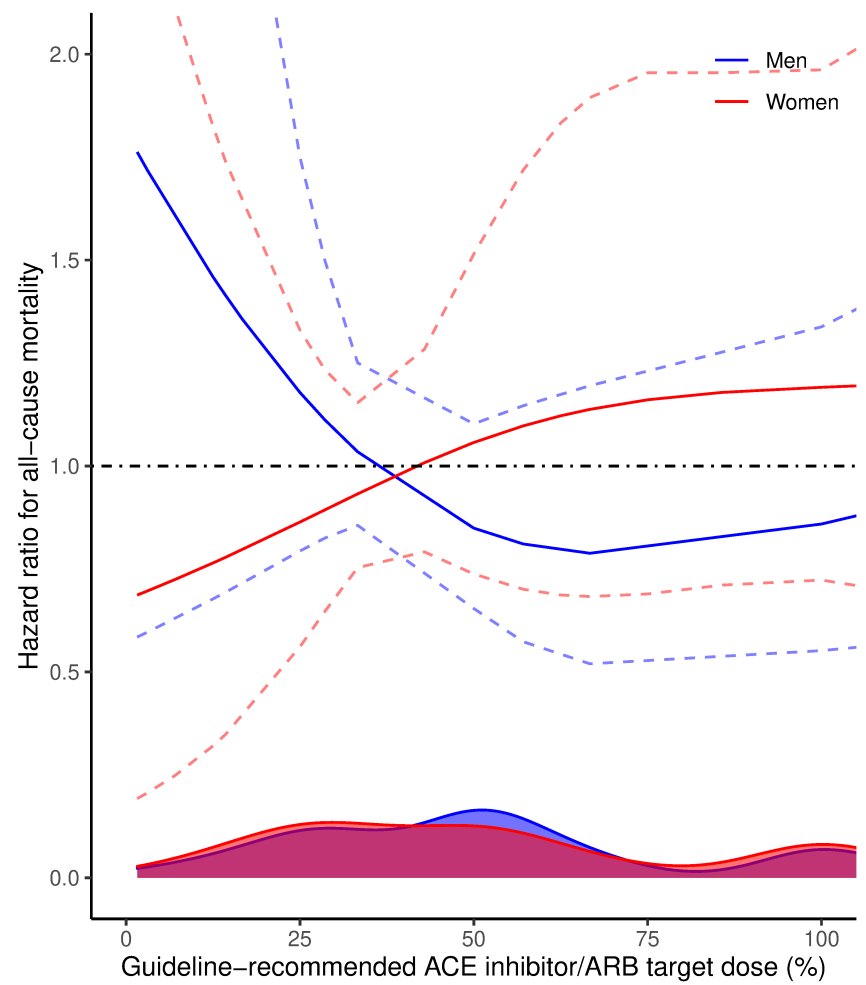

### B

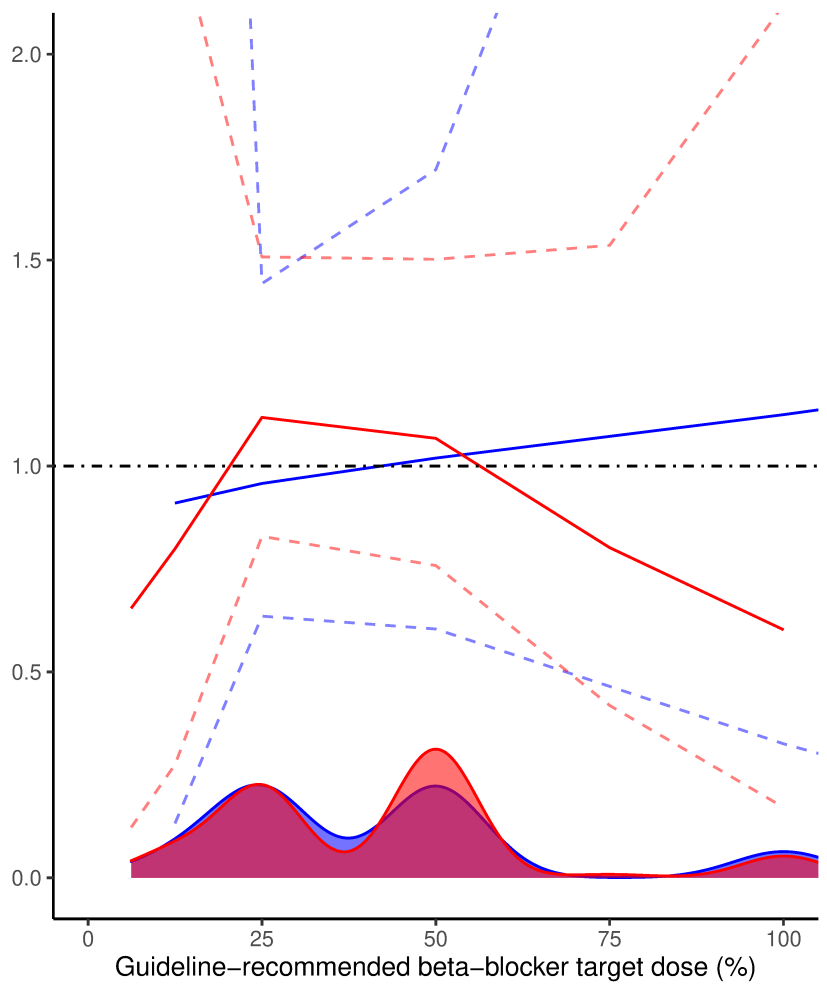

Supplement: heartjnl-2021-319229supp002.pdf [file heartjnl-2021-319229supp002.pdf]

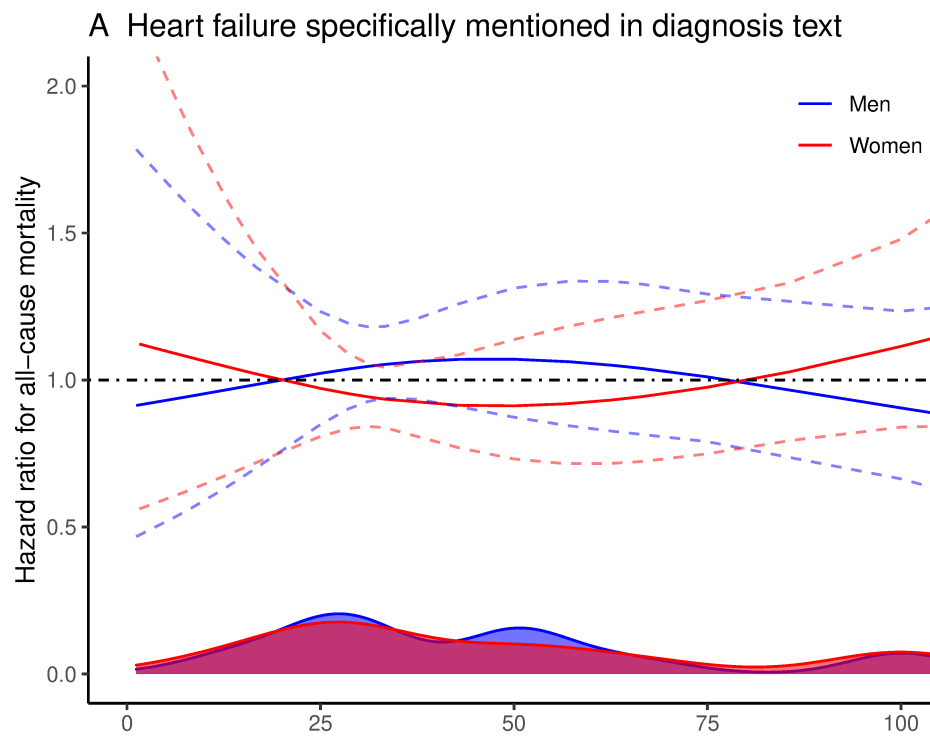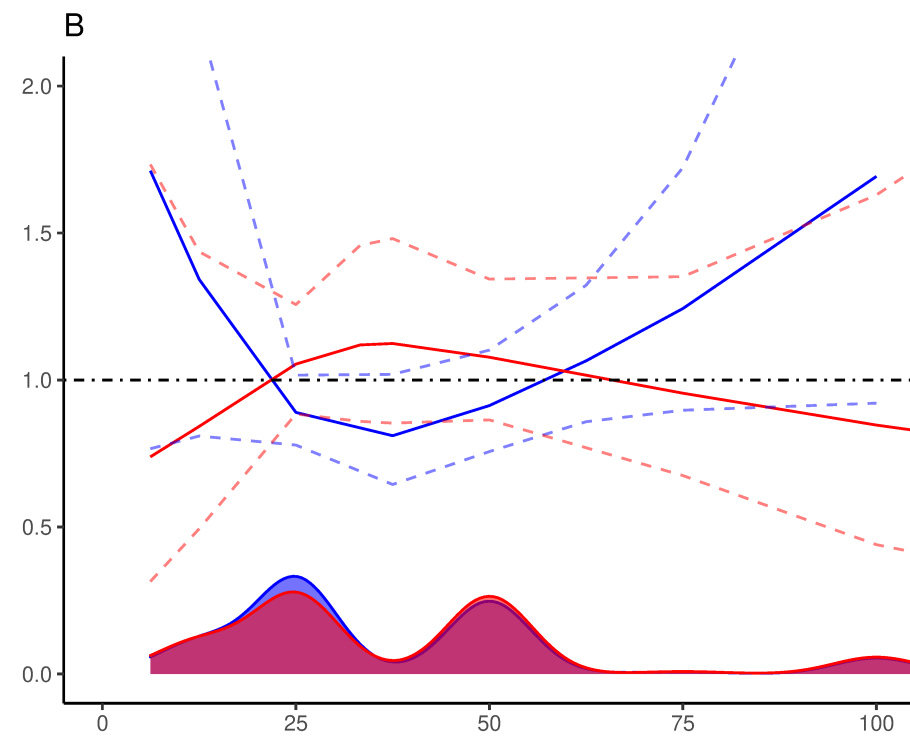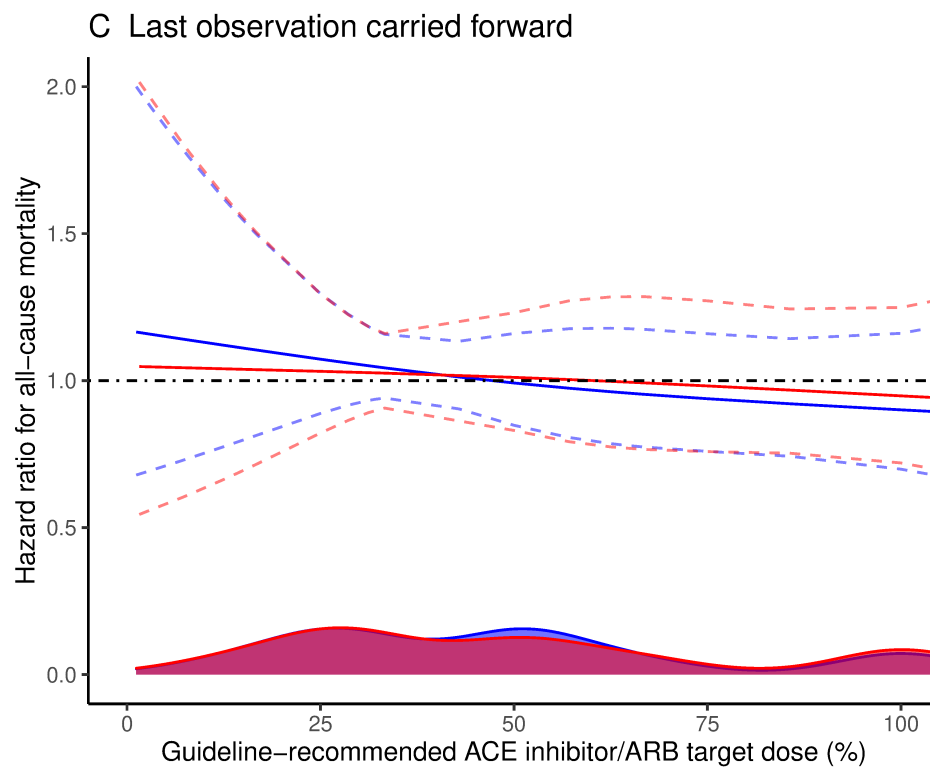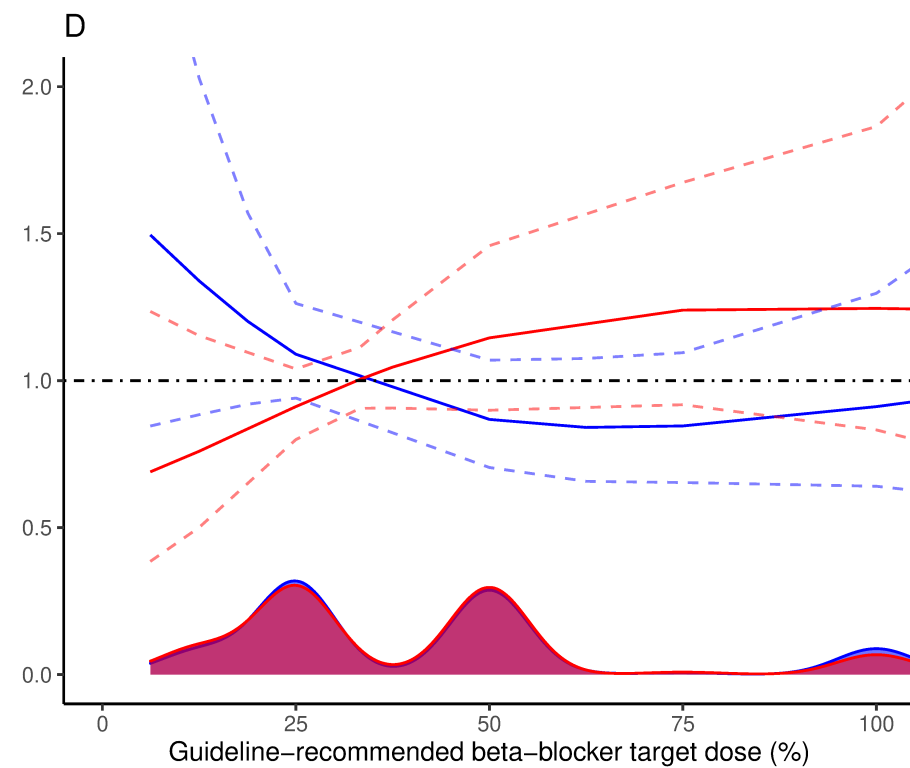

Supplement: heartjnl-2021-319229supp003.pdf [file heartjnl-2021-319229supp003.pdf]
