# Supplementary figures and images for: Heart failure medication dosage and survival in women and men seen at outpatient clinics
Source: HighWire-hosted journal article supplement (doi:10.1136/heartjnl-2021-319229), 2021-07-14

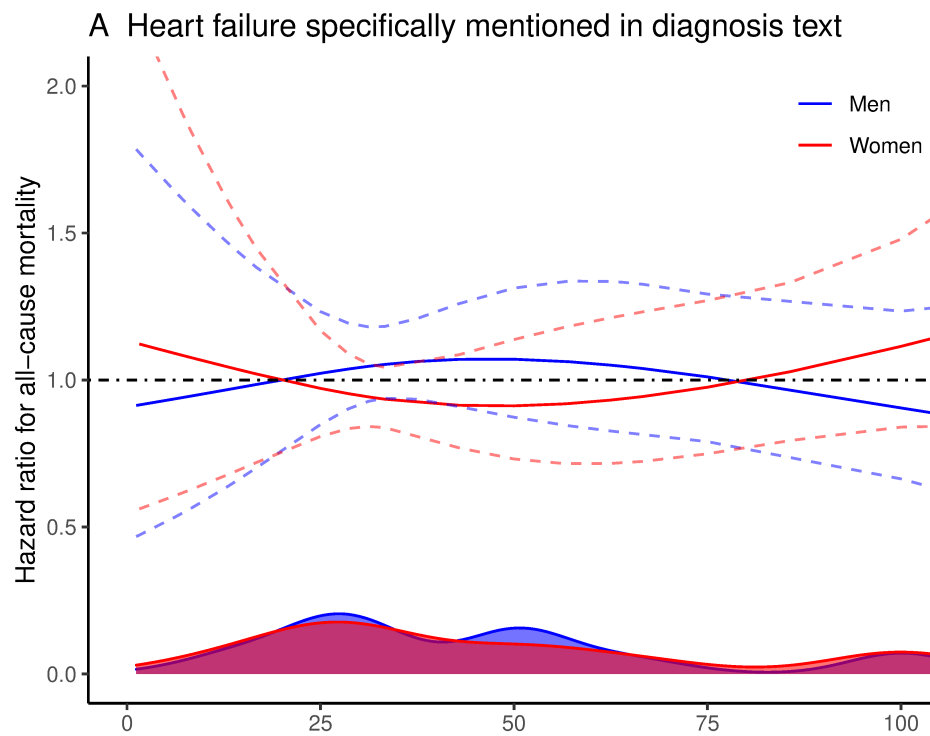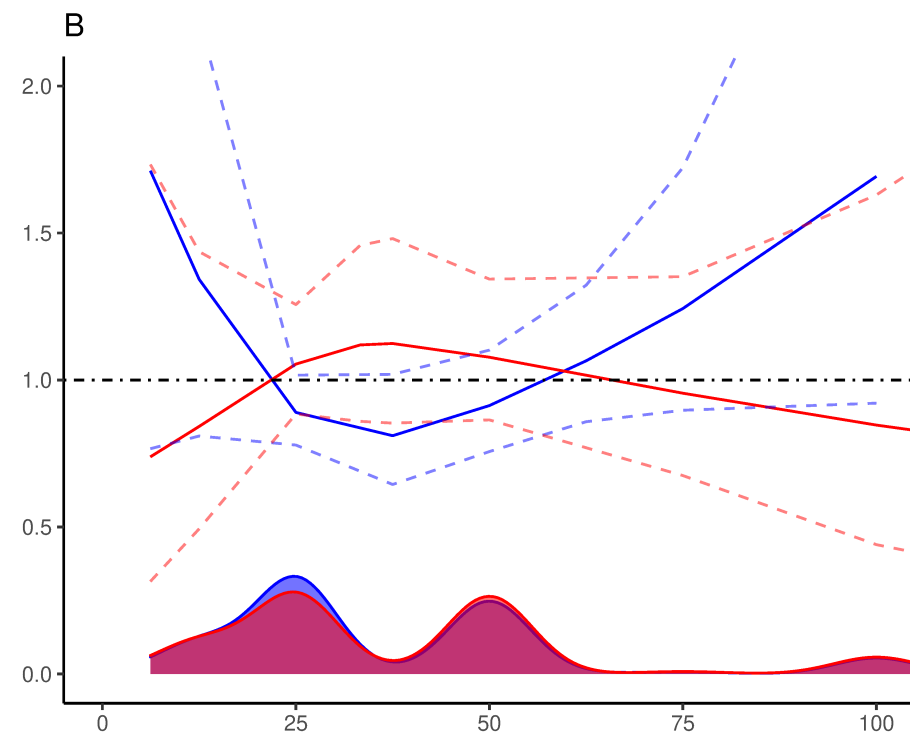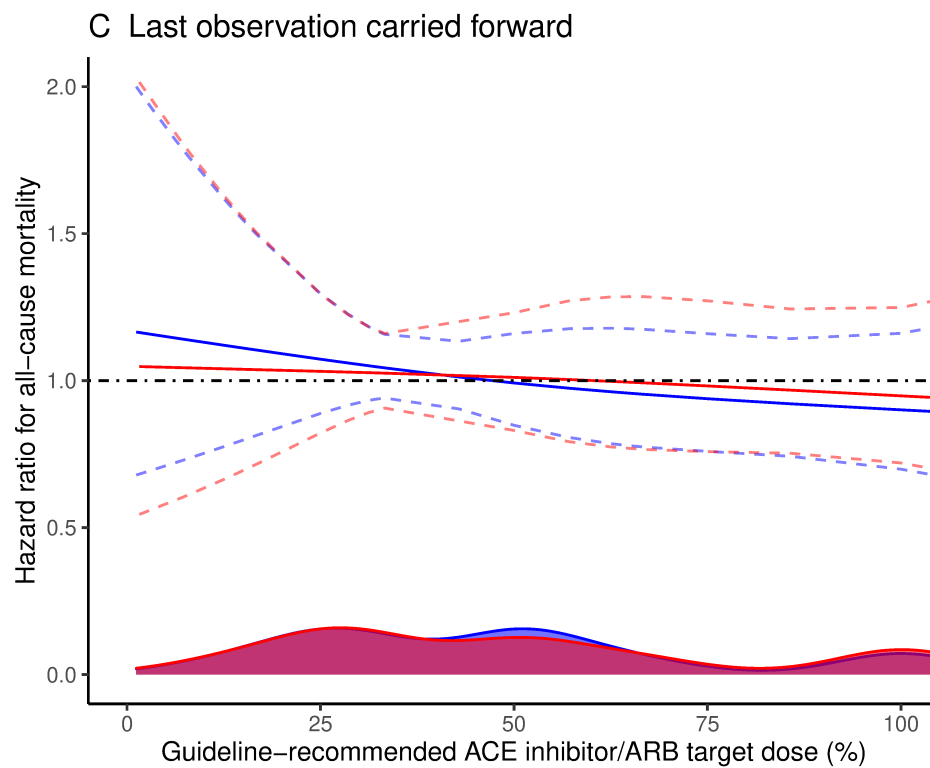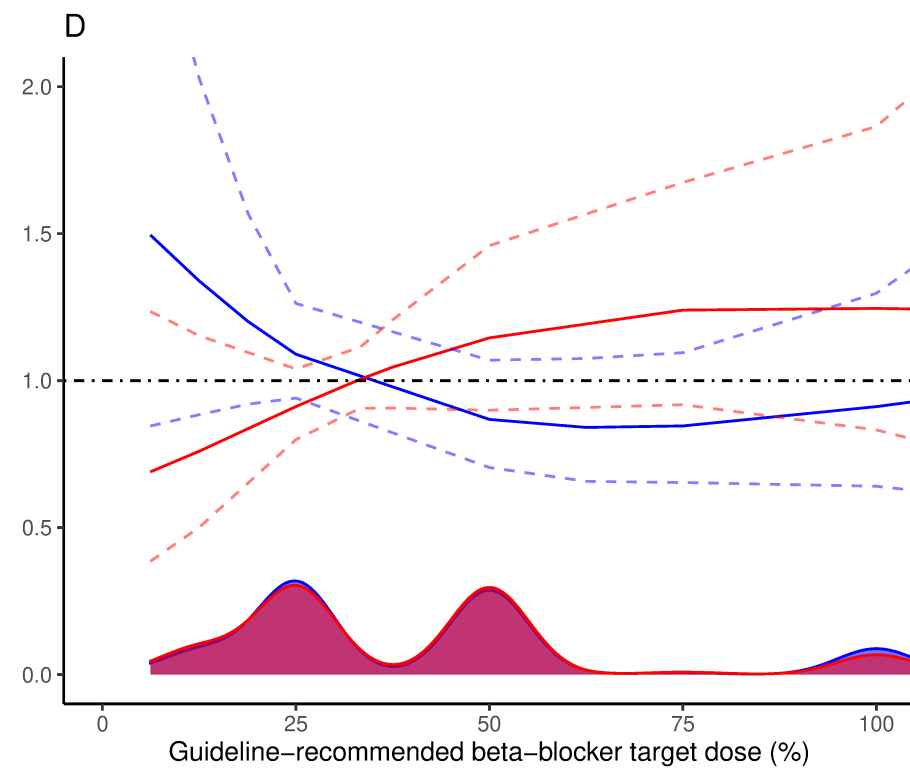

Supplement: heartjnl-2021-319229supp003_data_supplement.pdf [file heartjnl-2021-319229supp003_data_supplement.pdf]

### A Heart failure with preserved ejection fraction

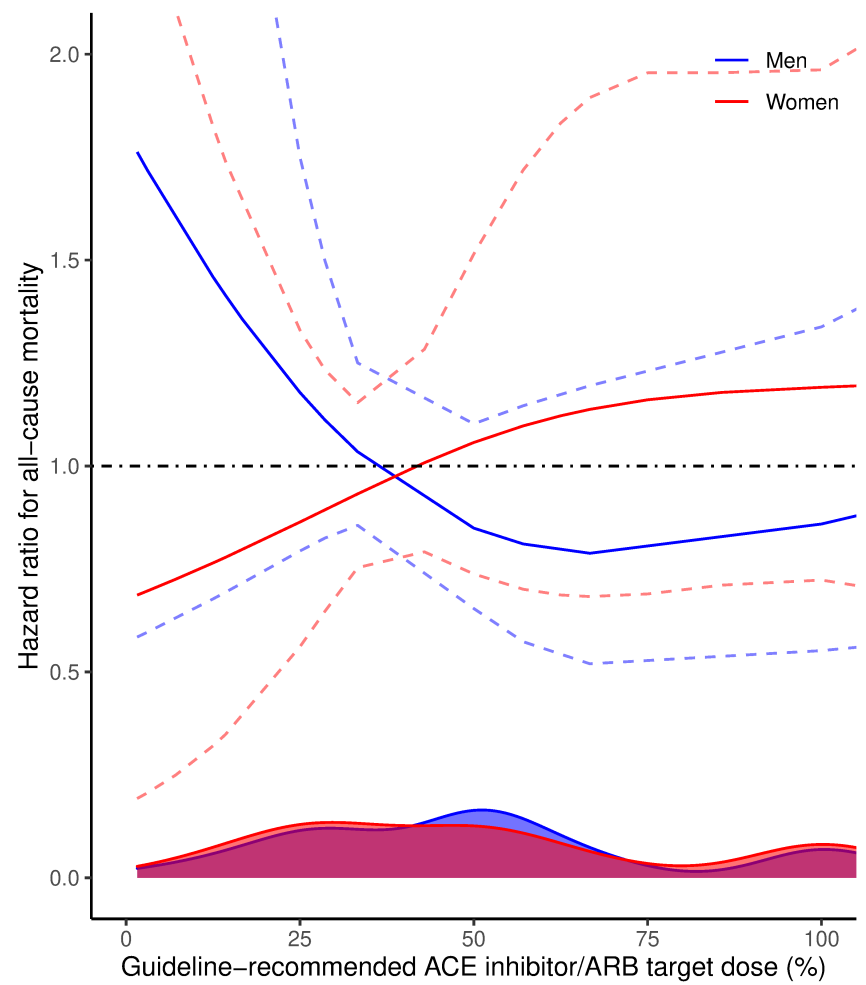

### B

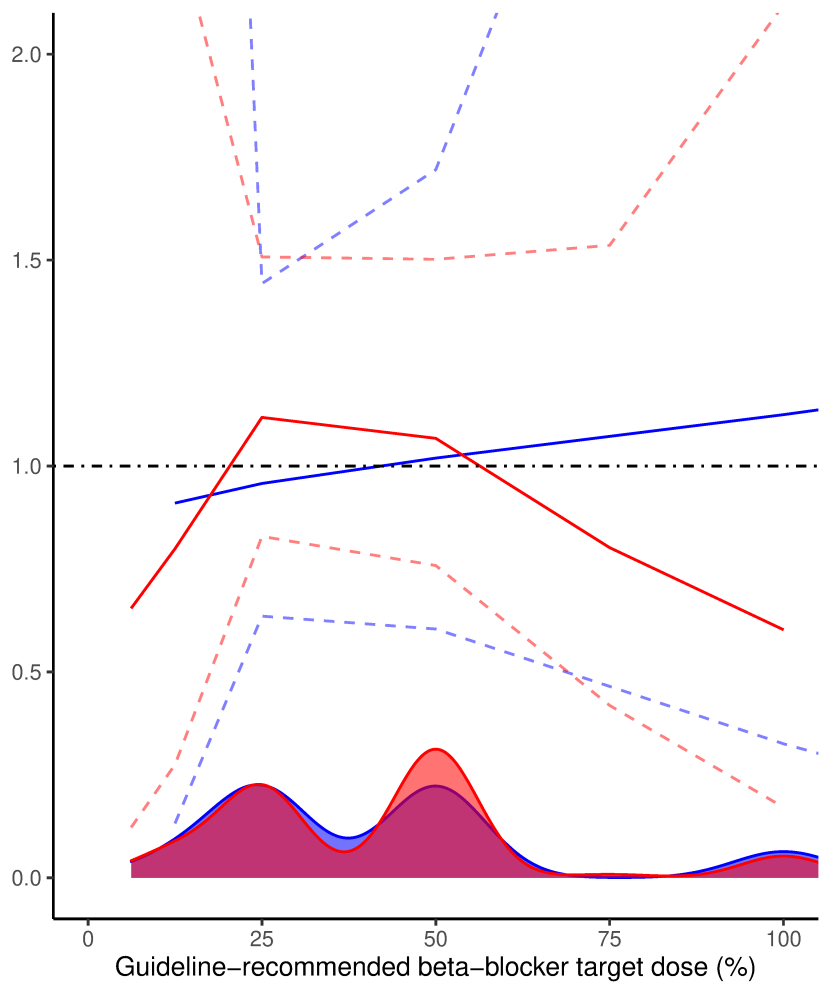

Supplement: heartjnl-2021-319229supp002_data_supplement.pdf [file heartjnl-2021-319229supp002_data_supplement.pdf]
